# Supplementary material for: A multifunctional silicon-containing hyperbranched epoxy: controlled synthesis, toughening bismaleimide and fluorescent properties
Source: Royal Society of Chemistry journal article supplement (doi:10.1039/c6tc02546c), 2016-01-01
Supplement: c6tc02546c1.pdf [file c6tc02546c1.pdf]

## ***Supporting Information for***

# **A multifunctional silicon-containing hyperbranched epoxy: controlled synthesis, toughening bismaleimide and fluorescent properties**

Song Niu\*, Hongxia Yan\*, Song Li, Cheng Tang, Zhengyan Chen, Xiaoli Zhi, Peilun Xu

*Key Laboratory of Polymer Science and Technology, Shaanxi Province, School of Science, Northwestern Polytechnical University, Xi'an 710129, China*

*Key Laboratory of Space Applied Physics and Chemistry, Ministry of Education, School of Science, Northwestern Polytechnical University, Xi'an 710129, China*

\*Corresponding author, Tel.: +862988431657.

E-mail: niusong84@163.com (S. Niu), hongxiayan@nwpu.edu.cn (H. Yan).

## **Contents**

1. Spectral characteristics for raw materials
2. Molecular weights of HPHEp and HPHEp-Polyether
3. The predicted  $^{29}\text{Si}$  NMR of SHBEp
4. TG and DSC curves of SHBEp
5. TG and DTG curves of SHBEp/BMI thermosets with different contents of SHBEp
- 6 Hyperbranched polysiloxanes
- 7 The fluorescent lifetime and the absolute fluorescence quantum yield of the SHBEp

## 1. Spectral characteristics for raw materials

### A-187

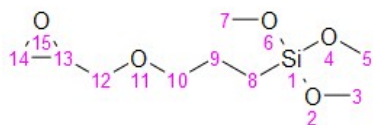

$^1\text{H}$  NMR (400 MHz, Chloroform-*d*)  $\delta$  3.60 (dd,  $J = 11.5, 3.0$  Hz,  $\text{H}^{12}$ ), 3.46 (s,  $\text{H}^3, \text{H}^5, \text{H}^7$ ), 3.41 – 3.31 (m,  $\text{H}^{10}, \text{H}^{12}$ ), 3.29 – 3.24 (m,  $\text{H}^{10}$ ) 3.02 (ddt,  $J = 5.8, 4.1, 2.8$  Hz,  $\text{H}^{13}$ ), 2.67 (dd,  $J = 5.1, 4.1$  Hz,  $\text{H}^{14}$ ), 2.49 (dd,  $J = 5.1, 2.7$  Hz,  $\text{H}^{14}$ ), 1.65 – 1.52 (m,  $\text{H}^9$ ), 0.63 – 0.51 (m,  $\text{H}^8$ ).

$^{13}\text{C}$  NMR (101 MHz, Chloroform-*d*)  $\delta$  73.33 ( $\text{C}^{10}$ ), 71.27 ( $\text{C}^{12}$ ), 50.68 ( $\text{C}^{13}$ ), 50.29 ( $\text{C}^3, \text{C}^5, \text{C}^7$ ), 44.02 ( $\text{C}^{14}$ ), 22.69 ( $\text{C}^9$ ), 5.09 ( $\text{C}^8$ ).

### NPG

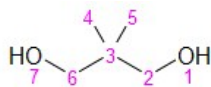

$^1\text{H}$  NMR (400 MHz, Chloroform-*d*)  $\delta$  4.02 (d,  $J = 1.0$  Hz,  $\text{H}^1, \text{H}^7$ ), 3.40 (s,  $\text{H}^2, \text{H}^6$ ), 0.84 (s,  $\text{H}^4, \text{H}^5$ ).

$^{13}\text{C}$  NMR (101 MHz, Chloroform-*d*)  $\delta$  70.50 ( $\text{C}^2, \text{C}^6$ ), 36.44 ( $\text{C}^3$ ), 21.32 ( $\text{C}^4, \text{C}^5$ ).

## 2. Molecular weights of HPHEp and HPHEp-Polyether

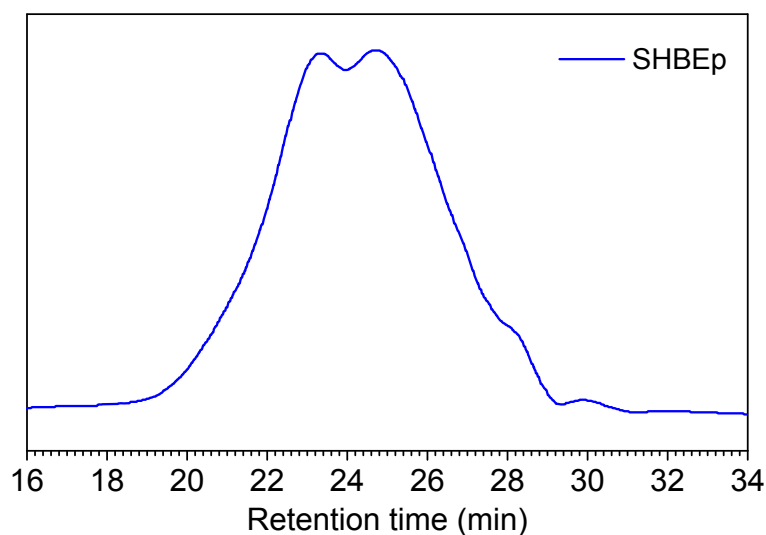

Fig. S1 The molecular weight of SHBEp by GPC.

Table S1 Characterization Data of the Three Samples

| Samples | $M_p$ | $M_n$ | $M_w$ | $M_z$ | PDI   |
|---------|-------|-------|-------|-------|-------|
| HPHEp   | 1864  | 846   | 9998  | 77069 | 11.80 |

### 3. The predicted $^{29}\text{Si}$ NMR of SHBEp

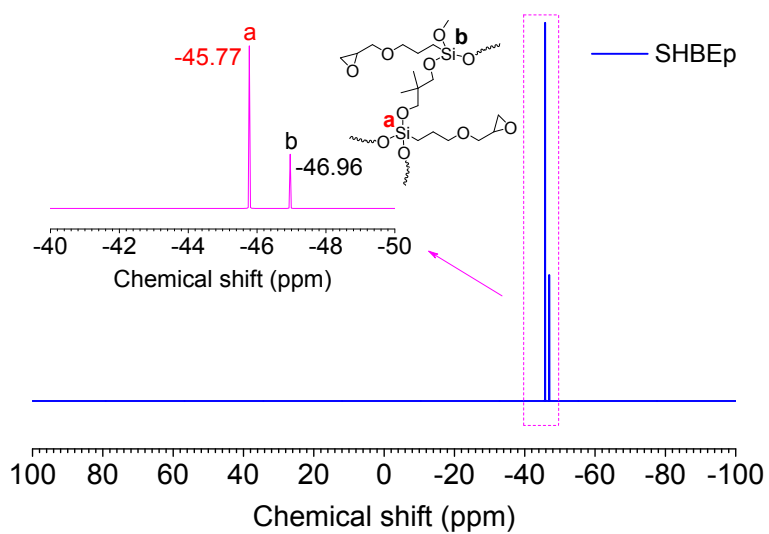

Fig. S2 The  $^{29}\text{Si}$  NMR spectra of SHBEp predicted by the software MestReNova v10.0.2.

### 4. TG and DSC curves of SHBEp

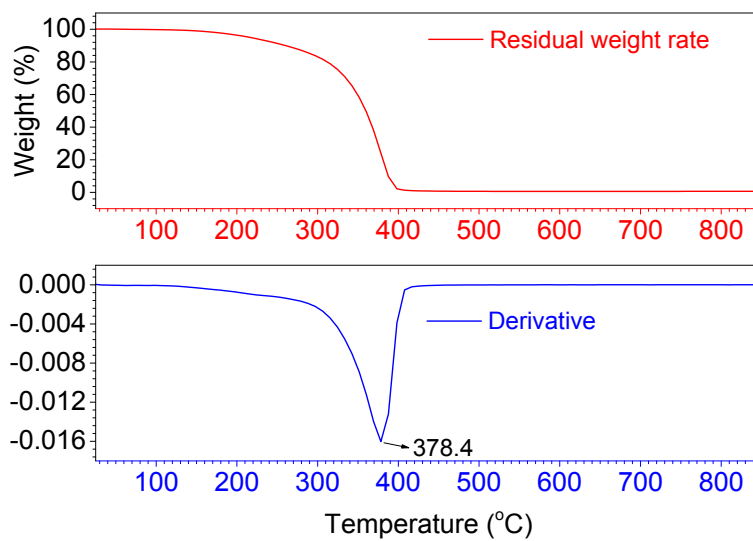

Fig. S3 TG analysis of SHBEp.

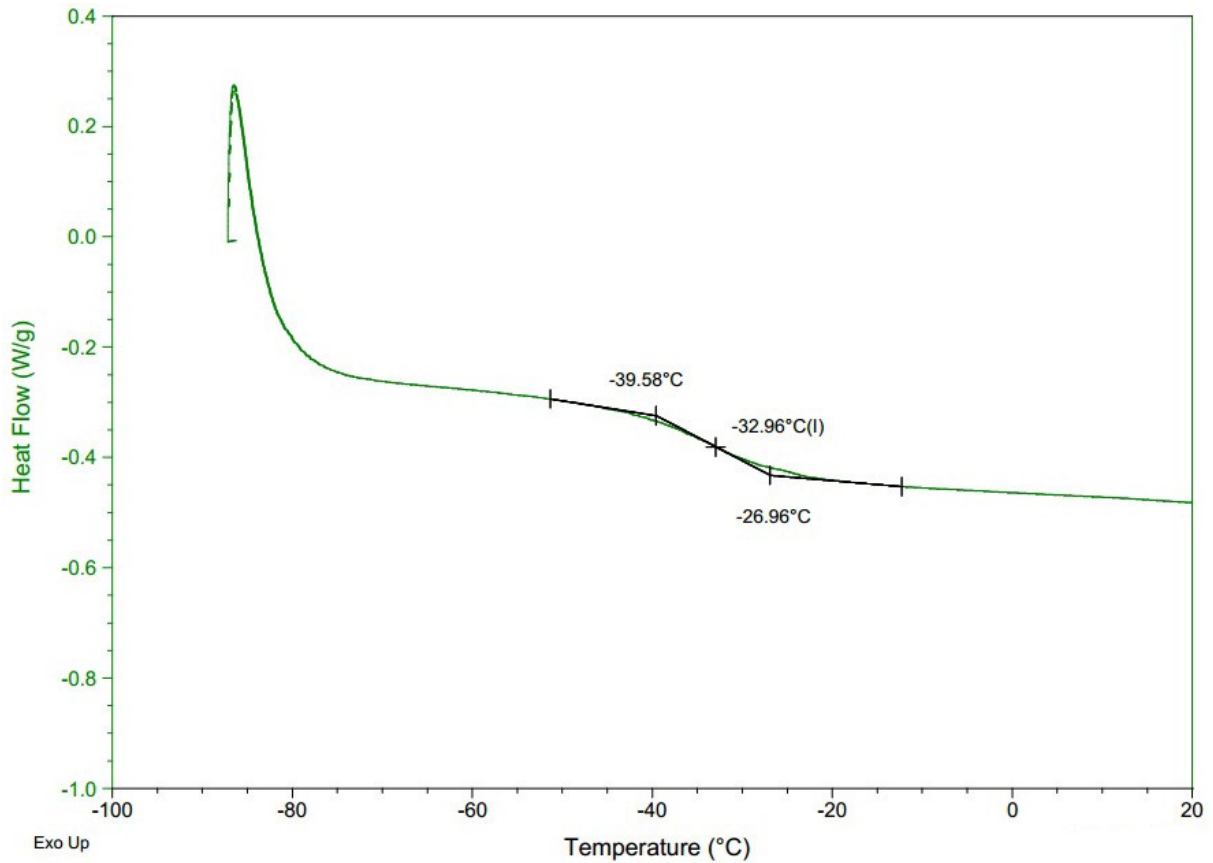

Fig. S4 The DSC curve of SHBEp.

### 5. TGA and DTG curves of E51/BMI and SHBEp/BMI thermosets

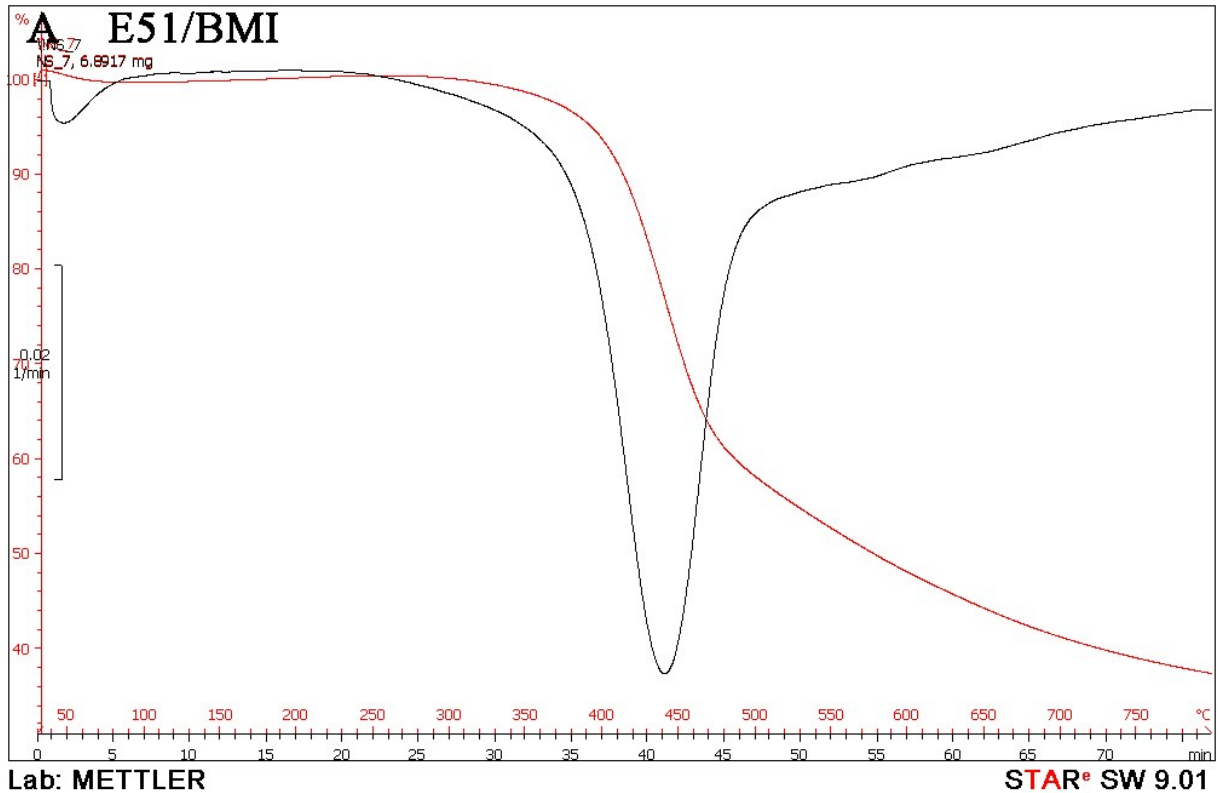

### B SHBEp0/BMI (Neat)

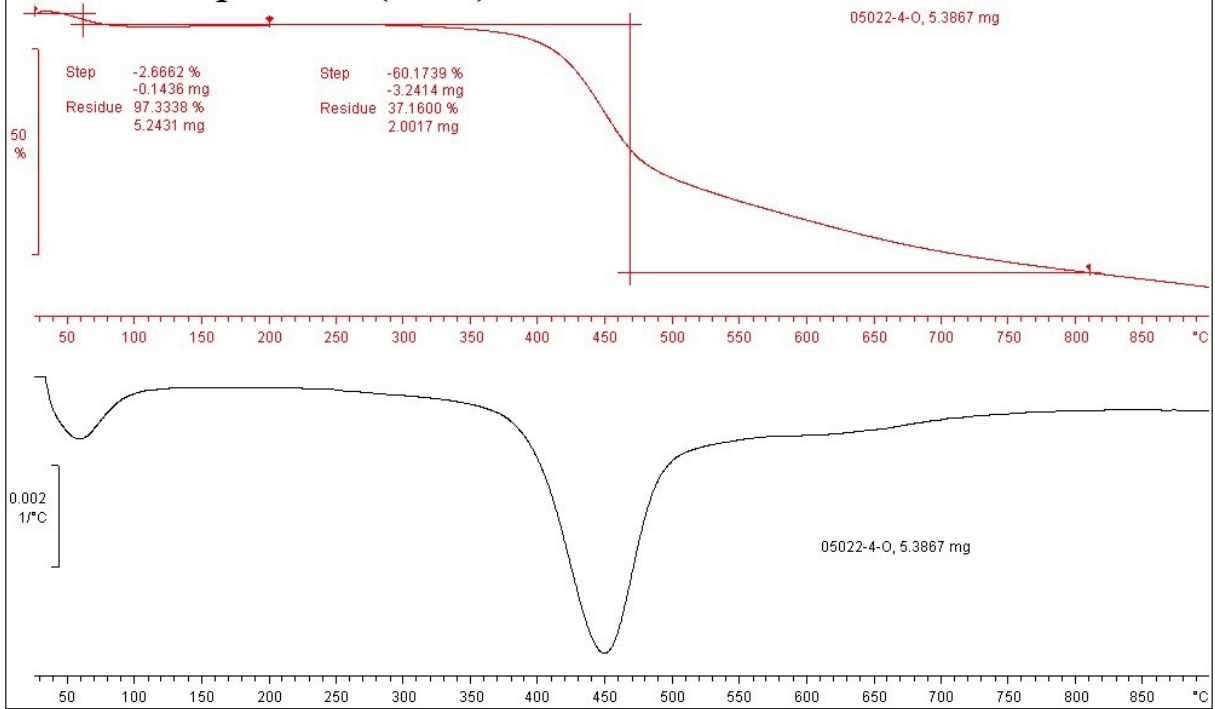

Lab: METTLER

STAR® SW 8.10

### C SHBEp4/BMI

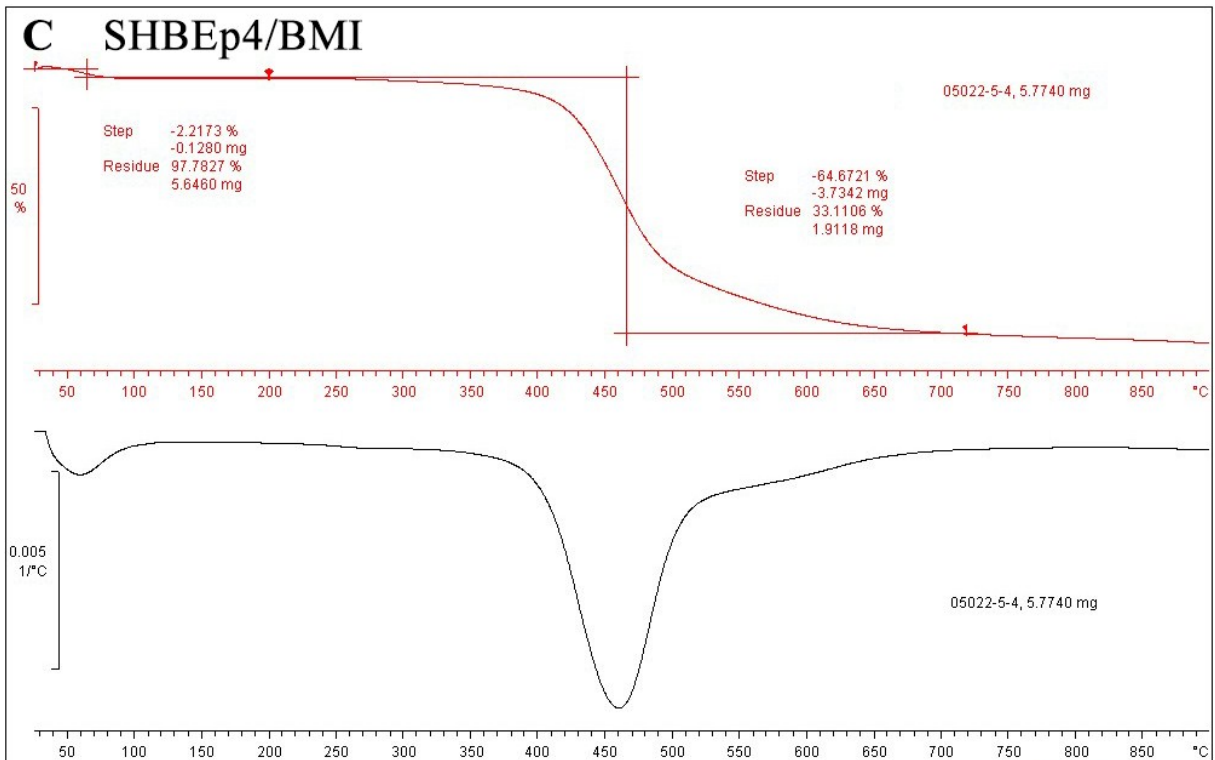

Lab: METTLER

STAR® SW 8.10

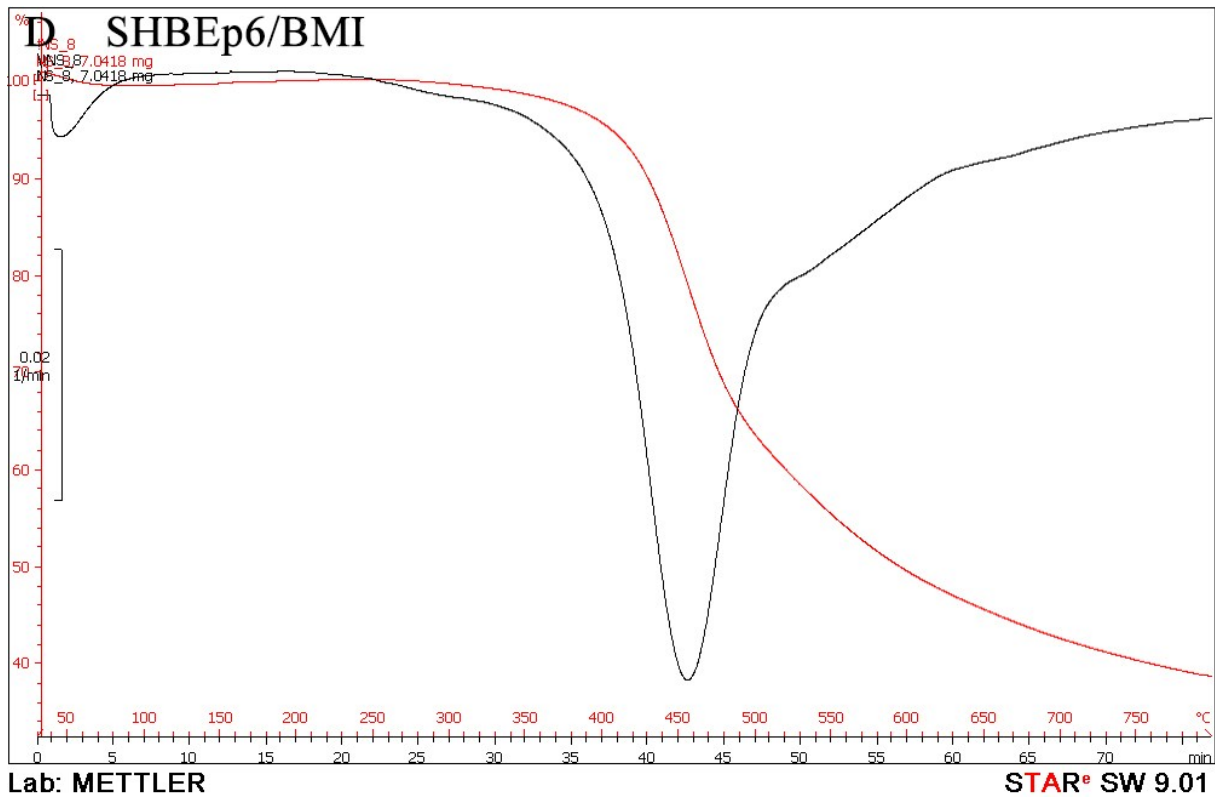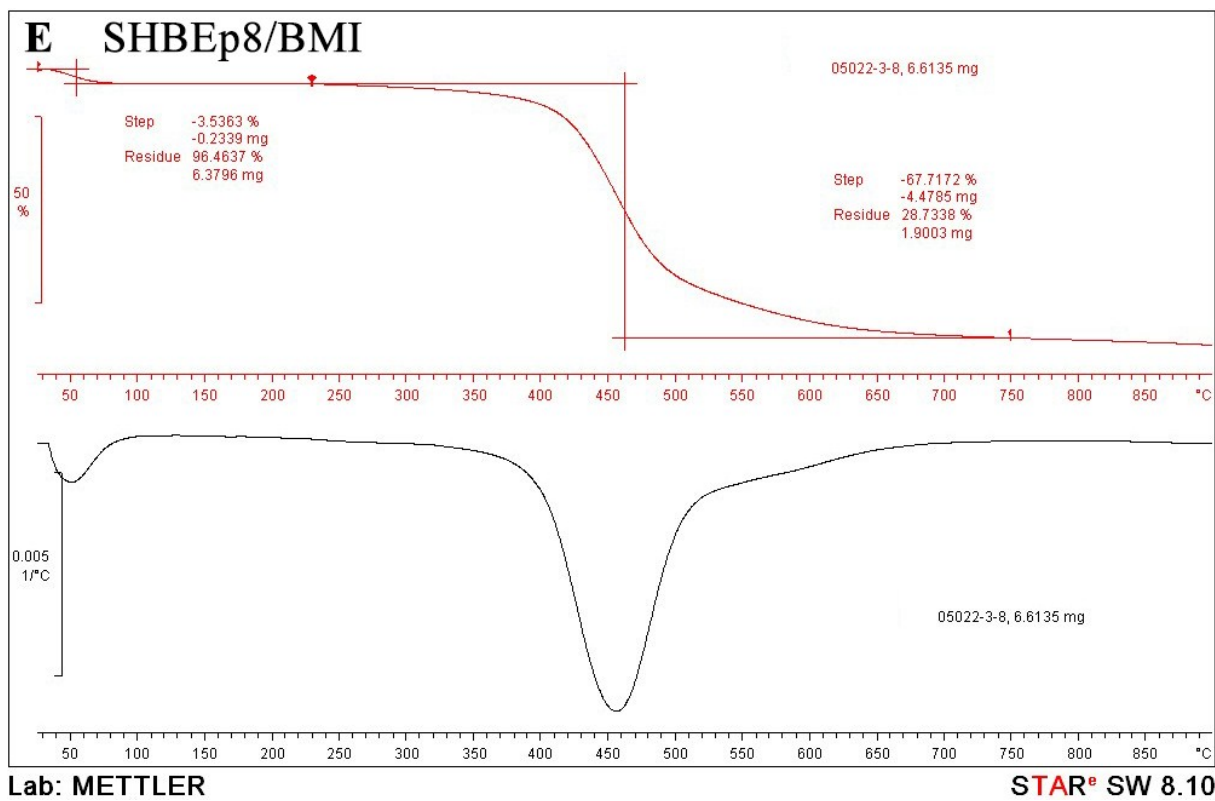

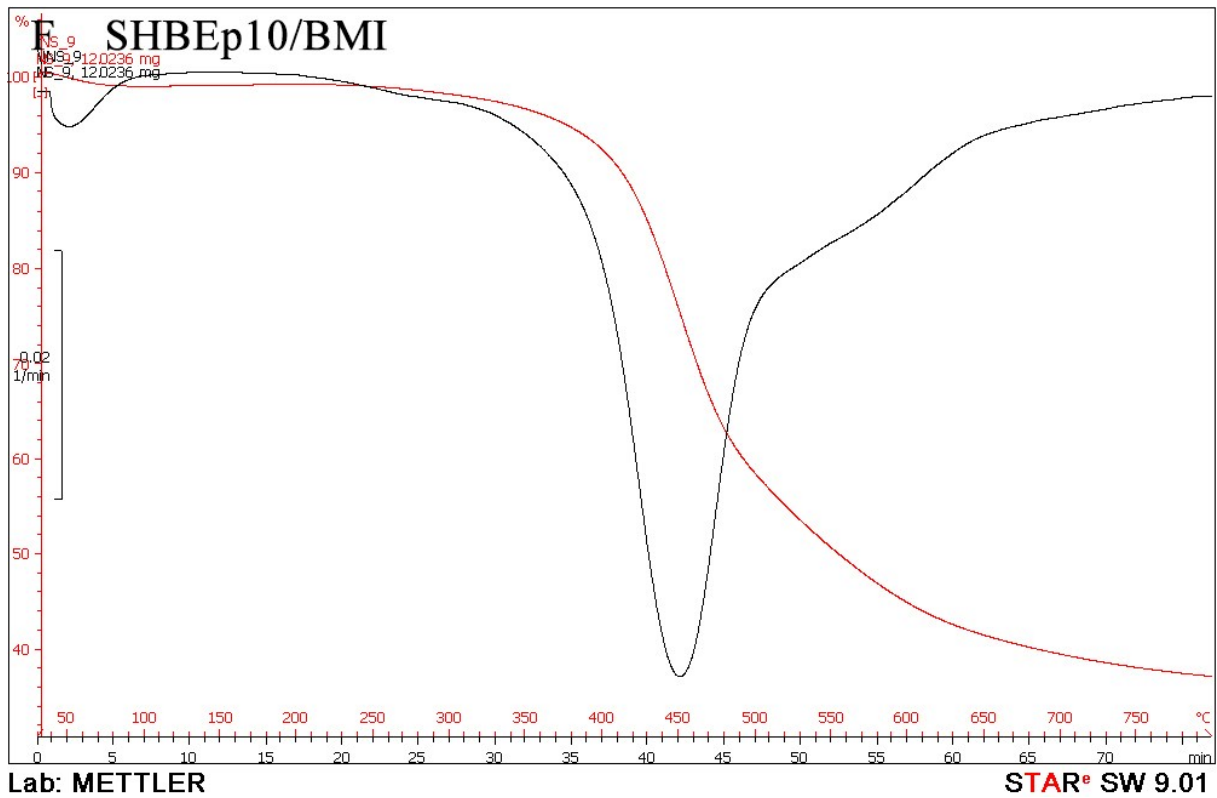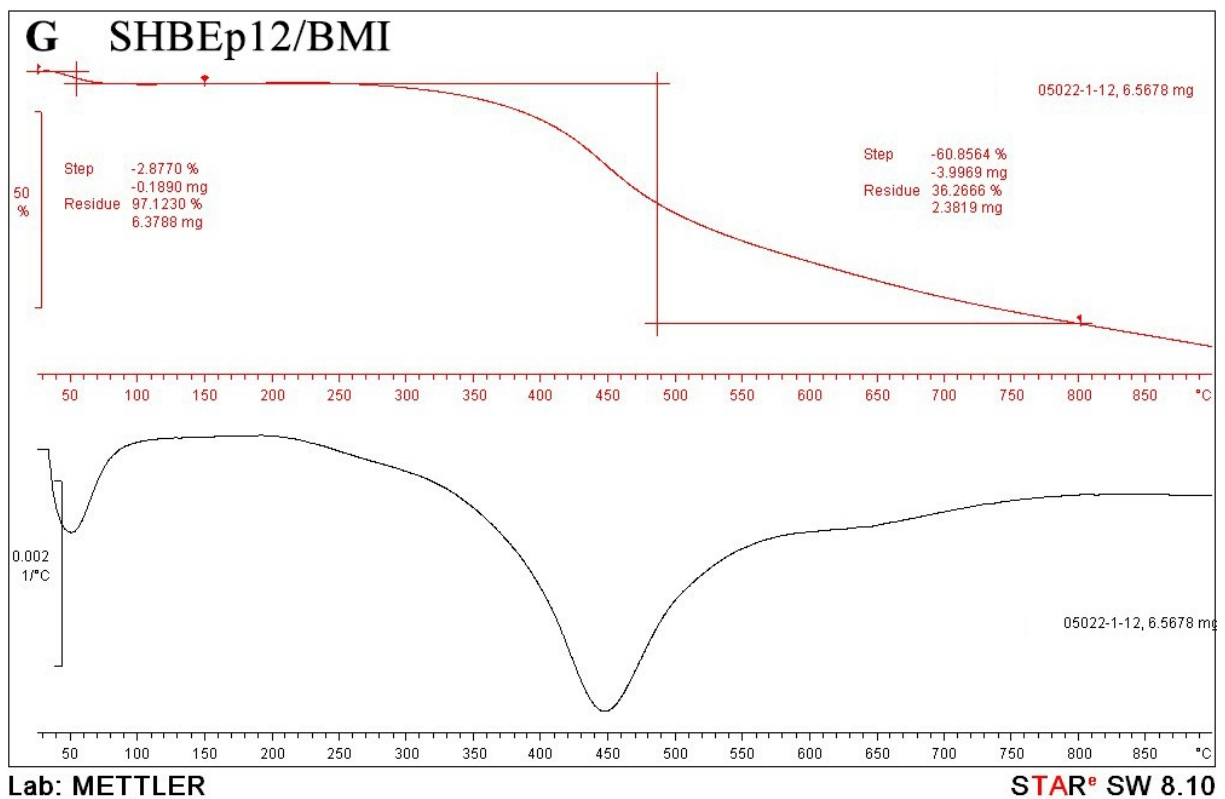

**Fig. S5** TGA and DTG curves of A) E51/BMI thermoset and SHBEp/BMI thermosets respectively with B) 0 wt%, C) 4 wt %, D) 6 wt%, E) 8 wt %, F) 10 wt% and G) 12 wt % SHBEp.

## 6 Hyperbranched polysiloxanes

### Polymer a:

In this polymerization,  $-\text{OCH}_3$  is excess compared to  $-\text{OH}$ . The mole ratio of A-187 and NPG is 1:1.36, that is, the mole ratio of  $-\text{OCH}_3$  and  $-\text{OH}$  is 3:2.72. The polymer (a) (Fig. S6a) was obtained using 0.592 mol A-151 (142.769 g) and 0.805 mol NPG (83.853 g) based on the synthesis procedure of SHBEp (b) (Fig. S6b);

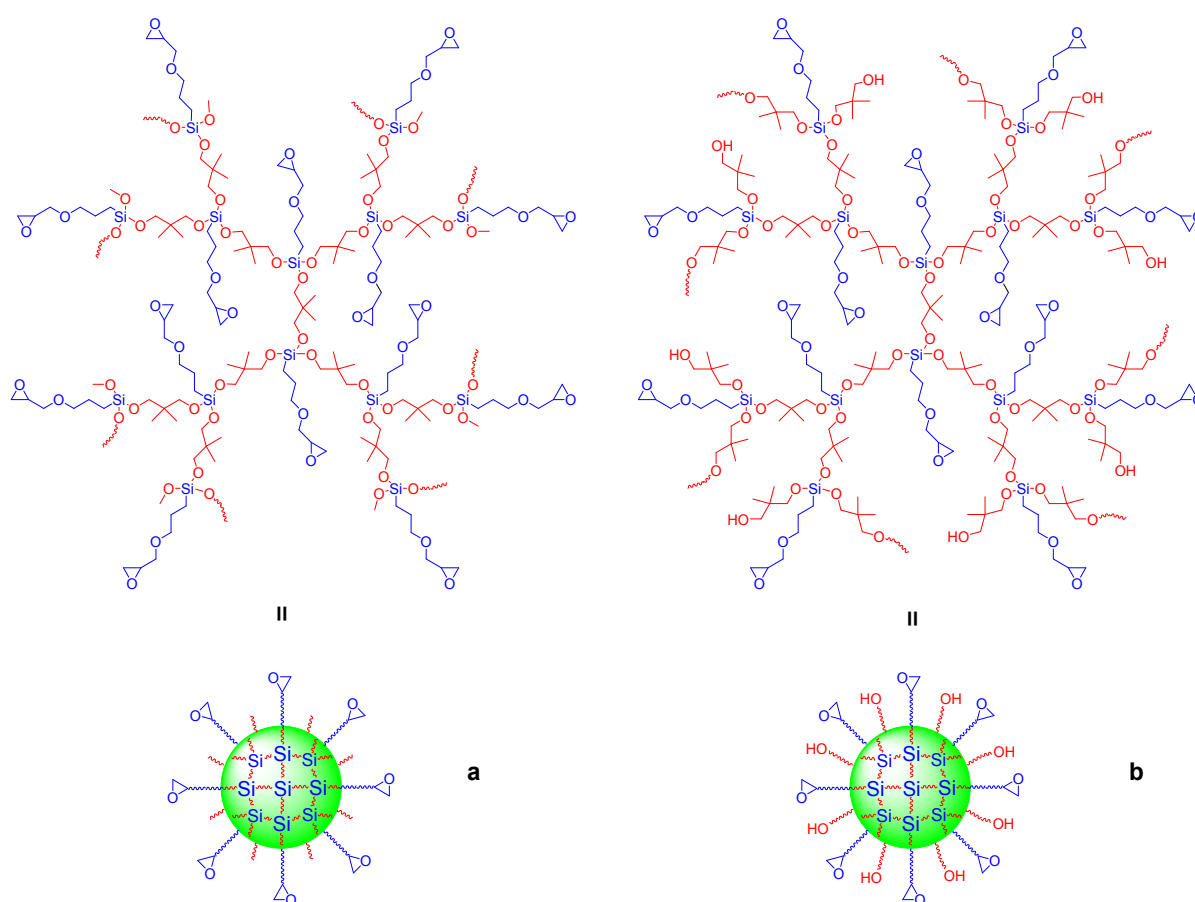

**Fig. S6** a) Hyperbranched polysiloxanes with excessive  $-\text{OCH}_3$  and b) hyperbranched polysiloxanes with excessive  $-\text{OH}$  groups.

### Polymer c and d:

(1) 0.27 mol TEOS (99.5%, 56.53 g), 0.87 mol NPG (90.44 g), and 0.05 g *p*-TSA were charged into a four-necked flask equipped with a thermometer, a top stirrer, a gas inlet, and a distilling setup at room temperature.  $\text{N}_2$  protection was provided by supplying  $\text{N}_2$  gas through the gas inlet. Then the reaction mixture was heated to about 110 °C, and kept at this



temperature till some distillate was distilled off. Thereafter the heating was continued to raise the temperature of the reaction mixture to about 160 °C and keep the temperature of the distillate at  $78 \pm 2$  °C. The reaction mixture was maintained at 160 °C till the distillate temperature dropped below 55 °C. Finally, the silicone-based polymer terminated with hydroxyl groups (**c**) (Fig. S7c) was prepared;

(2) 0.643 mol TBAA (98.5%, 103.027 g) was further added to the reaction mixture after its temperature was dropped below 100 °C. Then the reaction mixture was heated to about 120 °C, and kept at this temperature till some distillate was distilled off. After that, the temperature of the reaction mixture was raised to about 160 °C while the temperature of the distillate was kept at  $82 \pm 2$  °C. The reaction temperature was kept at 160 °C till the distillate temperature dropped below 55 °C. Finally, the silicone-based polymer containing acetoacetyl groups (**d**) (Fig. S7d) was obtained.

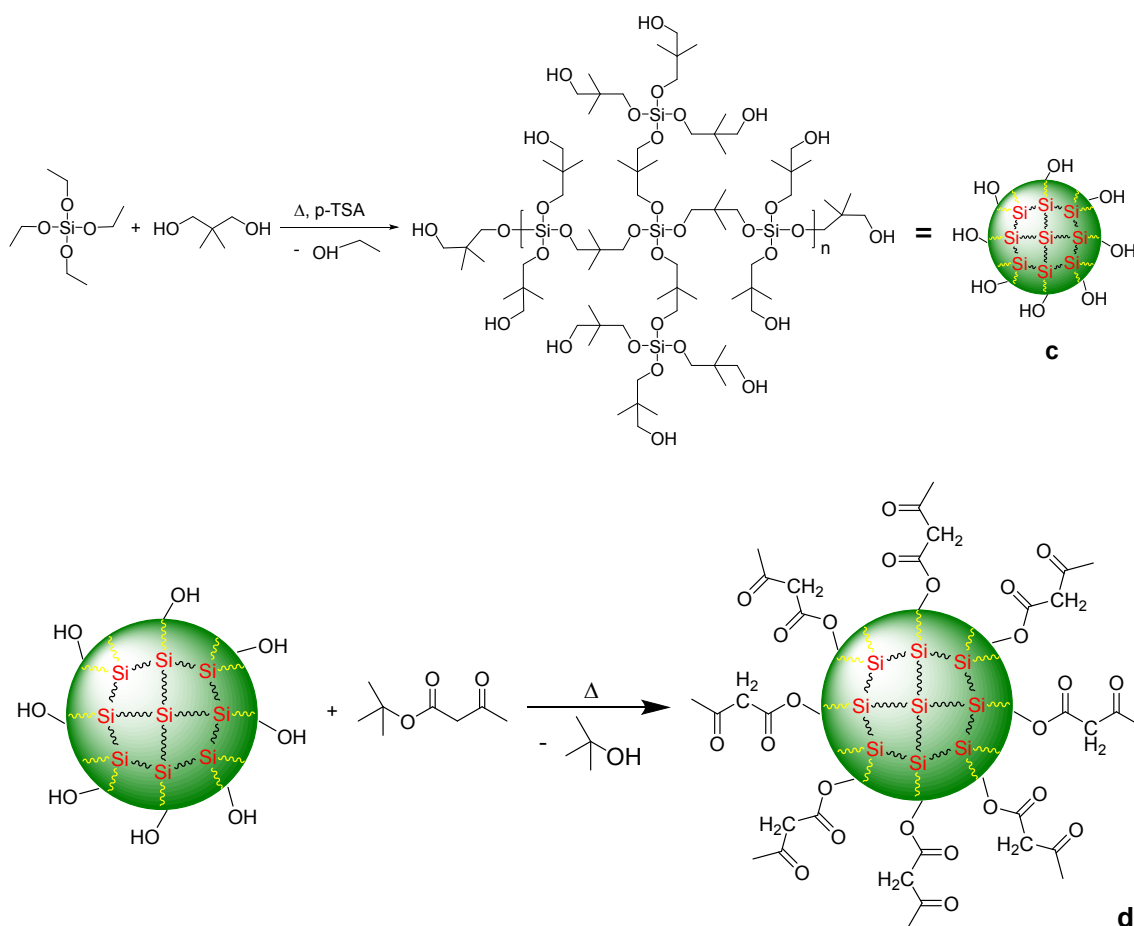

**Fig. S7** c) Hyperbranched polysiloxanes terminated with  $-\text{OH}$  groups and d) hyperbranched polysiloxanes terminated with acetoacetyl groups.

## 7 The fluorescent lifetime and the absolute fluorescence quantum yield of the SHBEp

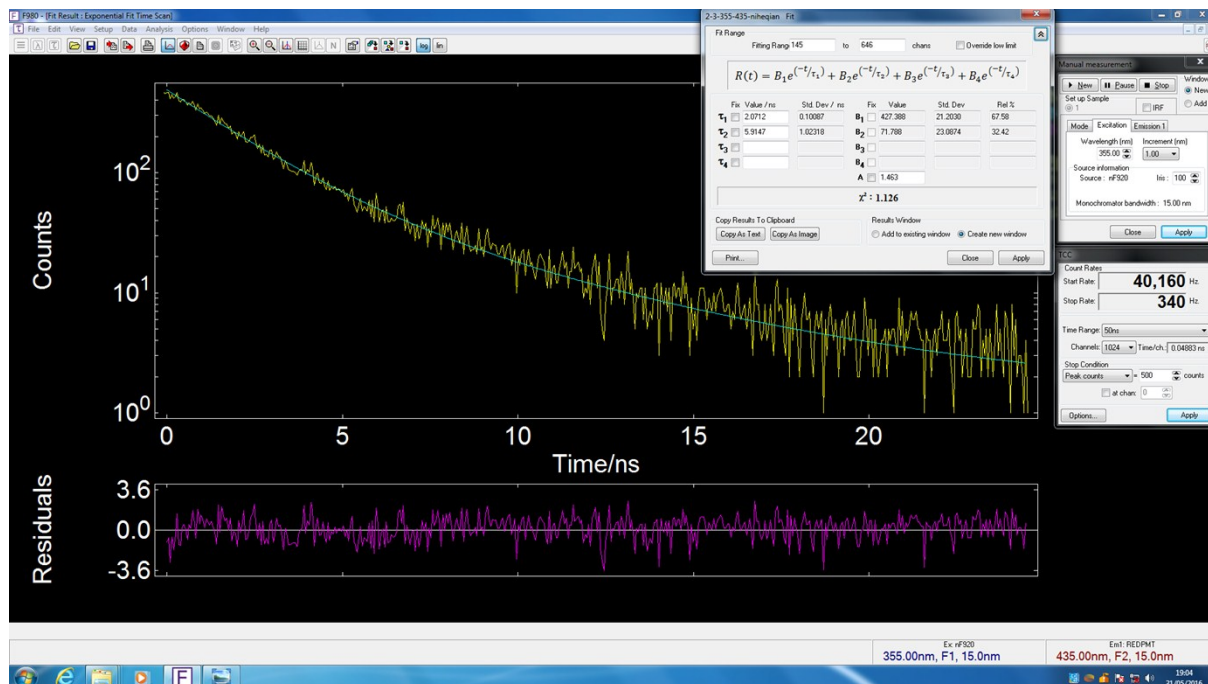

**Fig. S8** The printscreen of transient photoluminescence decay curve of the SHBEp from a steady/transient-state fluorescence spectrometer coupled with an integrating sphere (FLS980, Edinburgh Instruments).

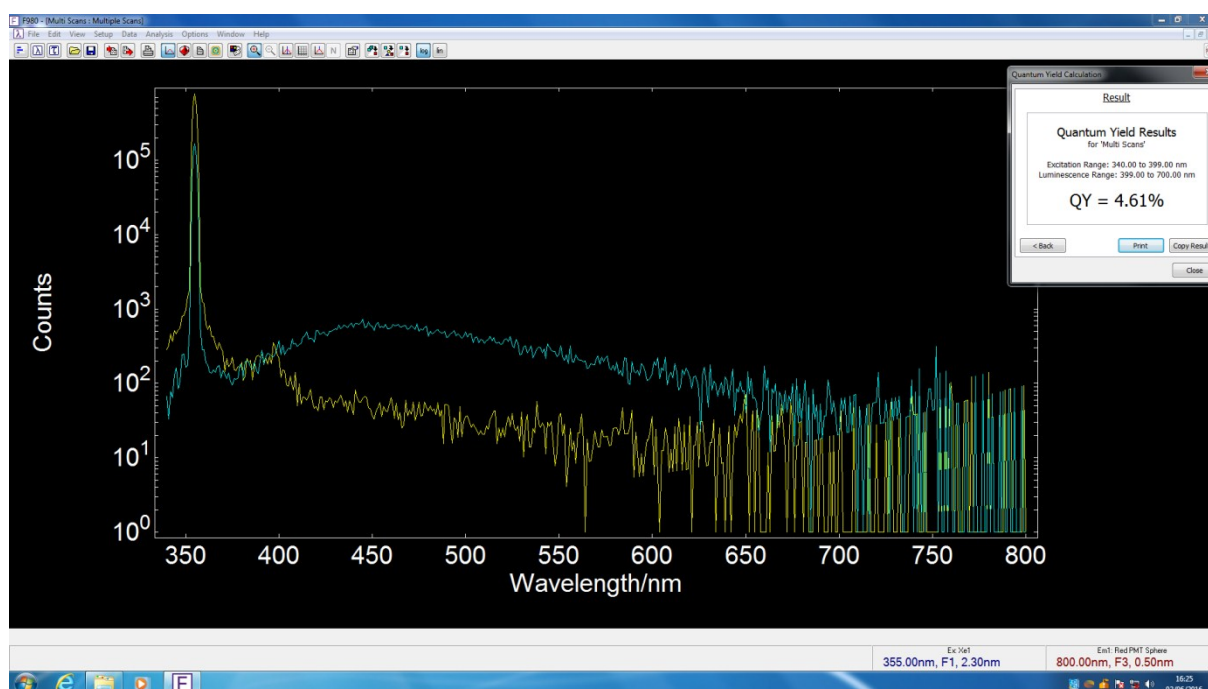

**Fig. S9** The printscreen of absolute fluorescence quantum yield of the SHBEp from a steady/transient-

state fluorescence spectrometer coupled with an integrating sphere (FLS980, Edinburgh Instruments).
